# Supplementary material for: Chemical-Physical Properties and Bioactivity of New Premixed Calcium Silicate-Bioceramic Root Canal Sealers
Source: MDPI journal article supplement (doi:10.3390/ijms232213914), 2022-11-11
Supplement: s1 [file s1]

# Chemical–Physical Properties and Bioactivity of New Premixed Calcium Silicate–Bioceramic Root Canal Sealers

**Fausto Zamparini <sup>1,2</sup>, Carlo Prati <sup>1</sup>, Paola Taddei <sup>3</sup>, Andrea Spinelli <sup>1</sup>, Michele Di Foggia <sup>3</sup>  
and Maria Giovanna Gandolfi <sup>2,\*</sup>**

<sup>1</sup> Endodontic Clinical Section, School of Dentistry, Department of Biomedical and Neuromotor Sciences, University of Bologna, 40125 Bologna, Italy

<sup>2</sup> Laboratory of Green Biomaterials and Oral Pathology, School of Dentistry, Department of Biomedical and Neuromotor Sciences, University of Bologna, 40125 Bologna, Italy

<sup>3</sup> Biochemistry Unit, Department of Biomedical and Neuromotor Sciences, University of Bologna, 40126 Bologna, Italy

\* Correspondence: [mgiovanna.gandolfi@unibo.it](mailto:mgiovanna.gandolfi@unibo.it)

**Table S1.** 950-400 cm<sup>-1</sup> IR bands wavenumbers and assignments [Hughes...] for just extruded NeoSealer Flo.

| Just extruded NeoSealer Flo<br>Wavenumber / cm <sup>-1</sup> | Assignments                                                              |
|--------------------------------------------------------------|--------------------------------------------------------------------------|
| 936 sh                                                       | PEG, alite, grossite                                                     |
| 913                                                          | Alite, calcium monoaluminate                                             |
| 880 sh                                                       | PEG, belite                                                              |
| 865                                                          | Calcium monoaluminate, grossite, tricalcium aluminate                    |
| 836                                                          | Calcium monoaluminate, belite                                            |
| 819                                                          | Calcium monoaluminate, grossite, tricalcium aluminate                    |
| 804                                                          | Calcium monoaluminate                                                    |
| 778                                                          | Calcium monoaluminate, tricalcium aluminate                              |
| 764                                                          | Tricalcium aluminate                                                     |
| 750 sh                                                       | Grossite                                                                 |
| 723                                                          | Calcium aluminate                                                        |
| 674                                                          | AlO <sub>6</sub> octahedra                                               |
| 652                                                          | Calcium aluminate                                                        |
| 634                                                          | Tantalite, AlO <sub>6</sub> octahedra                                    |
| 563 sh                                                       | AlO <sub>6</sub> octahedra                                               |
| 516                                                          | Fewly polymerized CxS silicate tetrahedra and AlO <sub>6</sub> octahedra |
| 460                                                          | AlO <sub>6</sub> octahedra                                               |
| 444                                                          | Fewly polymerized CxS silicate tetrahedra                                |
| 414                                                          | AlO <sub>6</sub> octahedra                                               |

sh = shoulder
